# Supplementary material
Source: PubMed Central journal article supplement (PMC8961342)
Supplement: NIHMS1725947-supplement-1.pdf [file NIHMS1725947-supplement-1.pdf]

## A database of tissue-specific rhythmically expressed human genes has potential applications in circadian medicine

Marc D. Ruben, Gang Wu, David F. Smith, Robert E. Schmidt, Lauren J. Francey, Yin Yeng Lee, Ron C. Anafi and John B. Hogenesch

*Sci Transl Med* **10**, eaat8806.  
DOI: 10.1126/scitranslmed.aat8806

### Body timing

Although the existence of circadian clock–dependent modulation of gene expression in humans has been known for more than a decade, the relevance of the circadian clock in drug response and therapeutic outcome has been only recently appreciated. Now, Ruben *et al.* used an algorithm called cyclic ordering by periodic structure (CYCLOPS) to create a database of cycling genes in 13 human tissues. The authors show that several rhythmically expressed genes code for known drug targets or for proteins involved in drug transport and metabolism. The data represent a useful resource for circadian medicine and strengthen the notion that circadian rhythms should be considered when determining therapeutic interventions.

|                         |                                                                                                                                                                                                                                                                                                                                                                                                                                                           |
|-------------------------|-----------------------------------------------------------------------------------------------------------------------------------------------------------------------------------------------------------------------------------------------------------------------------------------------------------------------------------------------------------------------------------------------------------------------------------------------------------|
| ARTICLE TOOLS           | <a href="http://stm.sciencemag.org/content/10/458/eaat8806">http://stm.sciencemag.org/content/10/458/eaat8806</a>                                                                                                                                                                                                                                                                                                                                         |
| SUPPLEMENTARY MATERIALS | <a href="http://stm.sciencemag.org/content/suppl/2018/09/10/10.458.eaat8806.DC1">http://stm.sciencemag.org/content/suppl/2018/09/10/10.458.eaat8806.DC1</a>                                                                                                                                                                                                                                                                                               |
| RELATED CONTENT         | <a href="http://stm.sciencemag.org/content/scitransmed/9/415/eaal2774.full">http://stm.sciencemag.org/content/scitransmed/9/415/eaal2774.full</a><br><a href="http://stm.sciencemag.org/content/scitransmed/8/324/324ra16.full">http://stm.sciencemag.org/content/scitransmed/8/324/324ra16.full</a><br><a href="http://stm.sciencemag.org/content/scitransmed/7/305/305ra146.full">http://stm.sciencemag.org/content/scitransmed/7/305/305ra146.full</a> |
| REFERENCES              | This article cites 41 articles, 8 of which you can access for free<br><a href="http://stm.sciencemag.org/content/10/458/eaat8806#BIBL">http://stm.sciencemag.org/content/10/458/eaat8806#BIBL</a>                                                                                                                                                                                                                                                         |
| PERMISSIONS             | <a href="http://www.sciencemag.org/help/reprints-and-permissions">http://www.sciencemag.org/help/reprints-and-permissions</a>                                                                                                                                                                                                                                                                                                                             |

Use of this article is subject to the [Terms of Service](#)

---

*Science Translational Medicine* (ISSN 1946-6242) is published by the American Association for the Advancement of Science, 1200 New York Avenue NW, Washington, DC 20005. 2017 © The Authors, some rights reserved; exclusive licensee American Association for the Advancement of Science. No claim to original U.S. Government Works. The title *Science Translational Medicine* is a registered trademark of AAAS.

## Supplementary Materials for

### **A database of tissue-specific rhythmically expressed human genes has potential applications in circadian medicine**

Marc D. Ruben, Gang Wu, David F. Smith, Robert E. Schmidt, Lauren J. Francey, Yin Yeng Lee, Ron C. Anafi, John B. Hogenesch\*

\*Corresponding author. Email: [john.hogenesch@cchmc.org](mailto:john.hogenesch@cchmc.org)

Published 12 September 2018, *Sci. Transl. Med.* **10**, eaat8806 (2018)  
DOI: 10.1126/scitranslmed.aat8806

#### **The PDF file includes:**

- Fig. S1. Pipeline for sample selection and CYCLOPS ordering for 13 tissues.
- Fig. S2. Numbers of cycling genes by different statistical thresholds and noncoding gene type.
- Fig. S3. Phase set enrichment in human and mouse counterpart tissues.
- Fig. S4. Gene expression traces for top cardio-cycling drug targets.
- Legends for data files S1 to S3

#### **Other Supplementary Material for this manuscript includes the following:**

(available at [www.sciencetranslationalmedicine.org/cgi/content/full/10/458/eaat8806/DC1](http://www.sciencetranslationalmedicine.org/cgi/content/full/10/458/eaat8806/DC1))

- Data file S1 (Microsoft Excel format). Cosinor regression output for all genes and all tissues.
- Data file S2 (Microsoft Excel format). Set of 54 genes that cycle in 8 or more of the 13 tissues.
- Data file S3 (Microsoft Excel format). Set of 136 cardio-cycler drug targets.

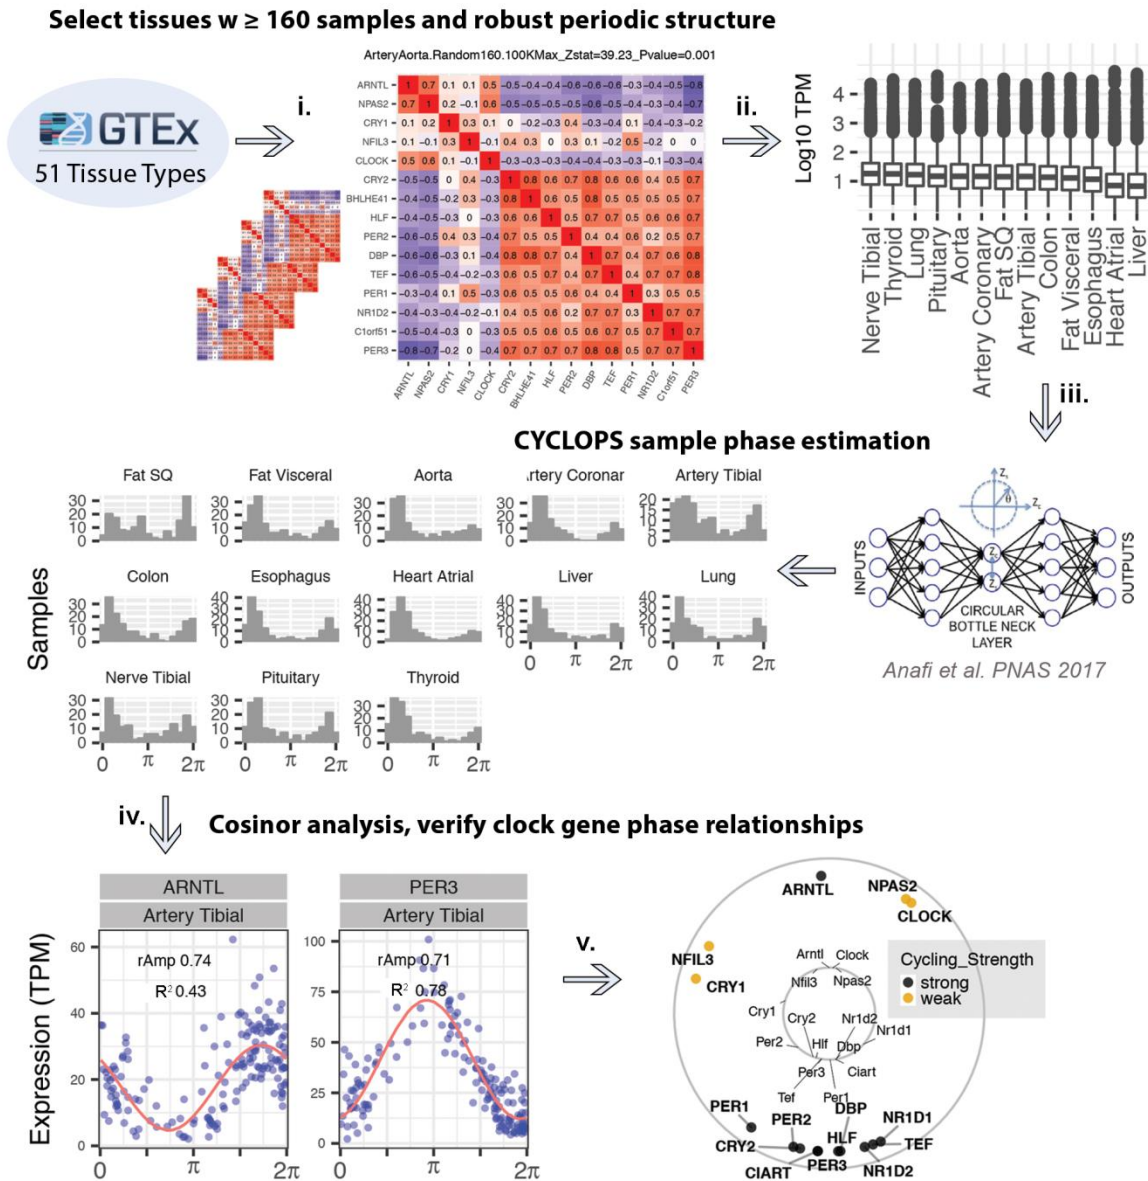

**Fig. S1. Pipeline for sample selection and CYCLOPS ordering for 13 tissues.** From the GTEx collection, we selected tissues with at least 160 samples *and* evidence of intact molecular clocks. When the mammalian circadian clock is progressing normally, core clock genes show characteristic temporal sequences in expression (3, 17, 51). **i.** To verify presence of hallmark core clock gene phase relationships in each tissue, we calculated pairwise correlation matrices (similar to the approach in (17)). This filtering step left us with 13 tissue types. **ii.** To further

enrich for samples with robust intact clocks at time of death, we selected a subset of 160 samples for each tissue that yielded the strongest clock gene correlation matrix following 100K random samplings. This favored sample sets that were on average younger, died suddenly, and had shorter times between death and tissue stabilization. Despite this, tissue sets retained extensive diversity (**Table 1**). **iii.** 160 samples from each tissue were CYCLOPS-ordered following parameters in Anafi et al., with deviations described in Methods. **iv.** To test for gene-level rhythms, cosinor regression was run on Transcripts per Million (TPM) values as a function of estimated sample phases for each of the top 15K expressed genes in each tissue. **v.** CYCLOPS-estimated phase relationships were analyzed for known clock genes to validate the quality of sample ordering.

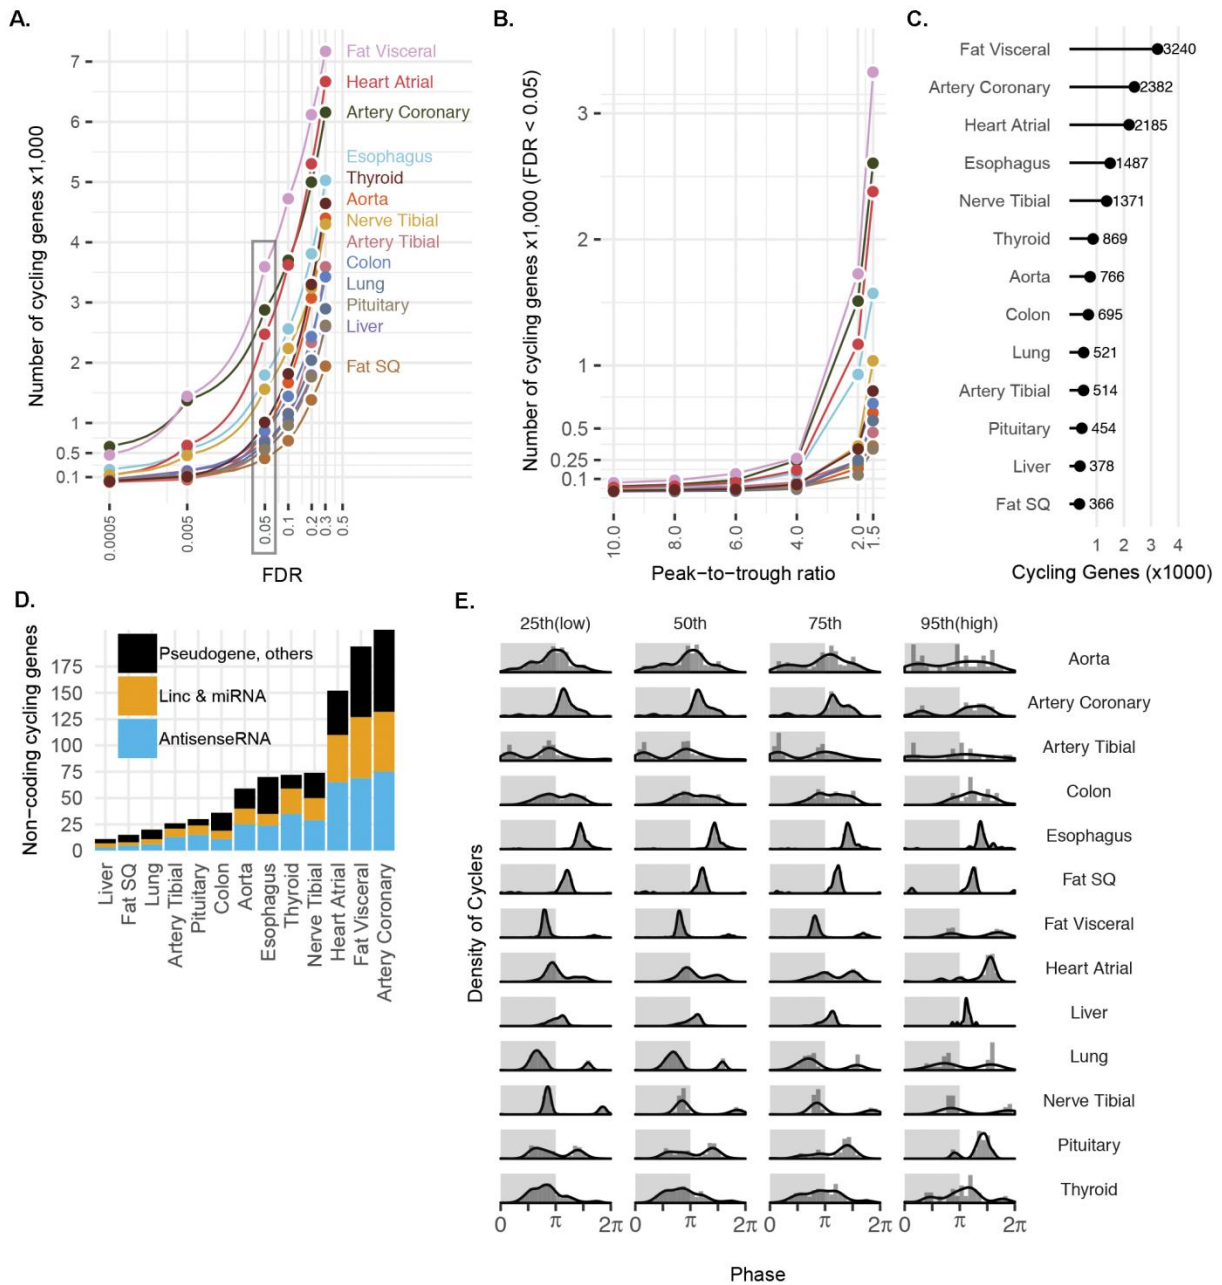

**Fig. S2. Numbers of cycling genes by different statistical thresholds and noncoding gene type.** (A) Cycling genes detected over a series of FDR thresholds, with no boundaries on  $rAmp$  or  $R^2$ . (B) Cycling genes detected over a series of peak-to-trough thresholds, requiring  $FDR < 0.05$ . (C) Cyclers counts at  $FDR < 0.05$ ,  $rAmp \geq 0.1$  and  $R^2 \geq 0.1$ . (D) Distribution of noncoding cycling genes by class ( $FDR < 0.05$ ,  $rAmp \geq 0.1$  and  $R^2 \geq 0.1$ ). (E) Distribution of peak phases

for cyclers (FDR < 0.05) at four different peak-to-trough ratio (ptr) cutoffs. The cutoffs include cyclers above the: 25th, 50th, 75th, or 95th percentiles for ptr, within each tissue.

● Human ● Mouse

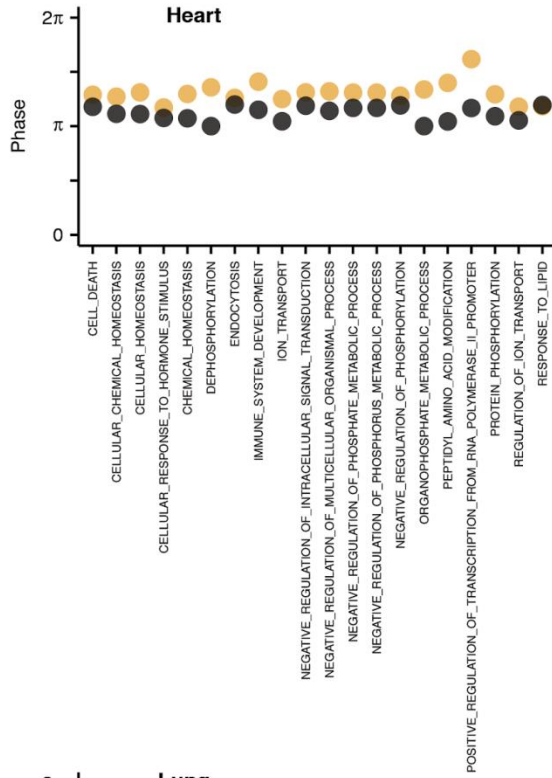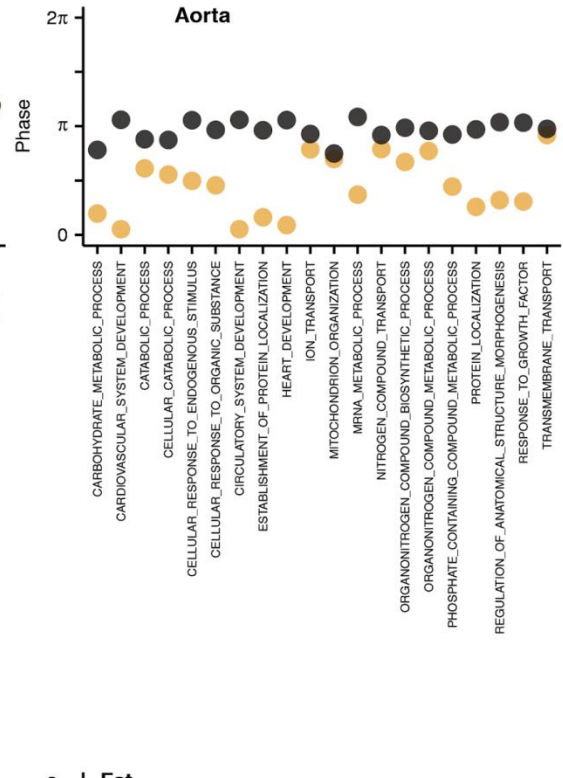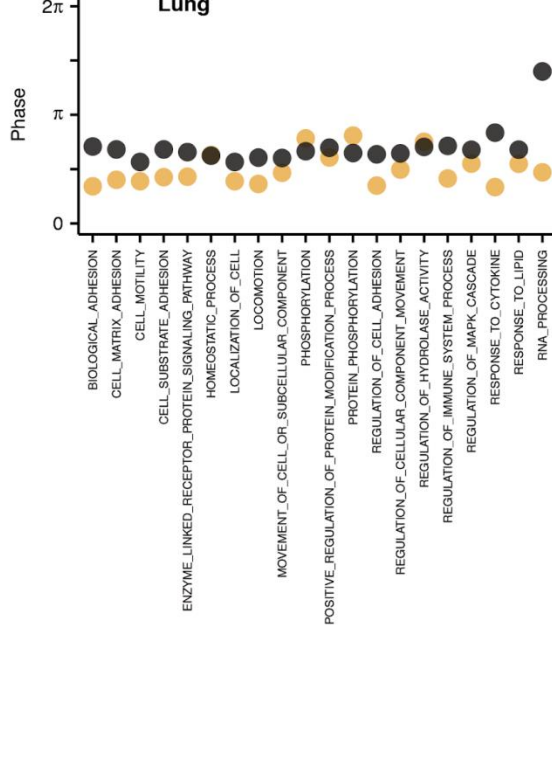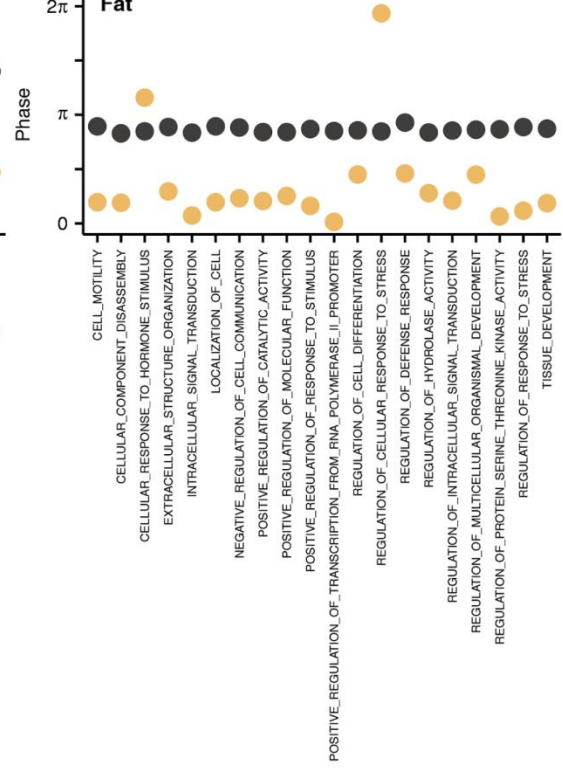

**Fig. S3. Phase set enrichment in human and mouse counterpart tissues.** PSEA was run on rhythmically-expressed genes in human (FDR < 0.05, rAmp  $\geq$  0.1, R<sup>2</sup>  $\geq$  0.1) and mouse-matched (JTK Q-value < 0.05) tissues. Peak phases of expression are plotted for the top 20 pathways that were identified as phase-enriched (Kuiper's test, p-value  $\leq$  0.05) in both species. Phase of *ARNTL* (human) or *Arntl* (mouse) was set to 0 for comparison. Human:mouse tissue comparisons were heart-atrium:whole heart; aorta:aorta; lung:lung; visceral fat:white fat.



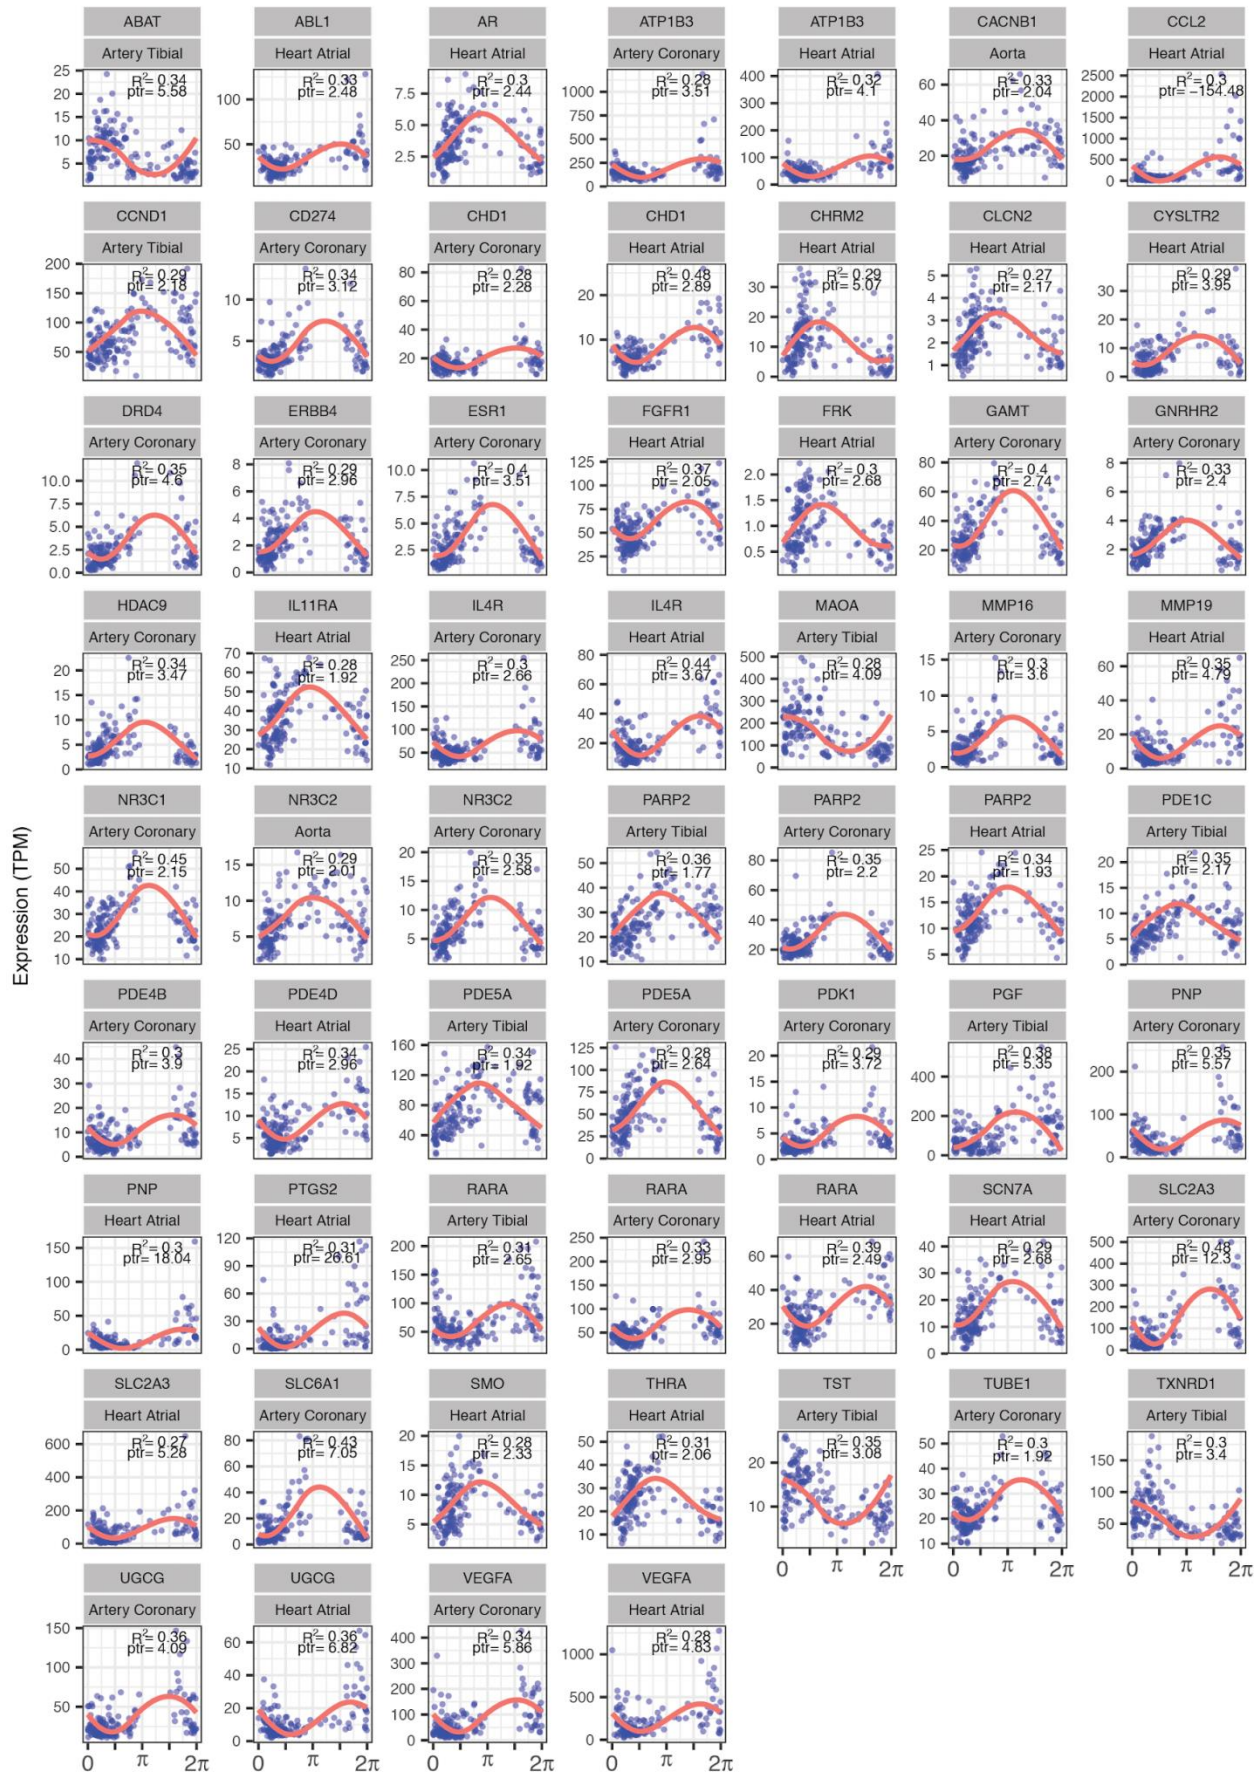

**Fig. S4. Gene expression traces for top cardio-cycling drug targets.** Top 60 cardio-cycling drug targets by amplitude. Coefficient of determination ( $R^2$ ) and peak-to-trough ratio (ptr) are indicated for each gene. A more permissive FDR threshold ( $\leq 0.1$ ) was applied here to detect potentially noisier, but high amplitude oscillations.

**Data file S1. Cosinor regression output for all genes and all tissues.** Provided as a separate excel file.

**Data file S2. Set of 54 genes that cycle in 8 or more of the 13 tissues.** Provided as a separate excel file.

**Data file S3. Set of 136 cardio-cycler drug targets.** Provided as a separate excel file.
